# Supplementary material for: Safety and Effectiveness of De-escalated Radiation Dose in T1-3 Nasopharyngeal Carcinoma: A Propensity Matched Analysis
Source: PubMed Central journal article supplement (PMC6775602; doi:10.7150/jca.33303), 2019-08-28
Supplement: jcav10p5057s1.pdf [file jcav10p5057s1.pdf]

Table S1 Results of univariate analysis of DMFS, OS and DFS.

| Variables  | DMFS                |       | OS                  |       | DFS                 |       |
|------------|---------------------|-------|---------------------|-------|---------------------|-------|
|            | HR(95%CI)           | p     | HR                  | p     | HR                  | P     |
| Age        | 0.017(0.987-1.048)  | 0.266 | 1.018(0.991-1.046)  | 0.220 | 1.015(0.992-1.038)  | 0.202 |
| Gender     | 0.386(0.136-1.099)  | 0.075 | 0.408(0.160-1.040)  | 0.060 | 0.690(0.357-1.333)  | 0.270 |
| T stage    |                     | 0.084 |                     | 0.070 |                     | 0.162 |
| T2 vs T1   | 0.446(0.176-1.132)  | 0.089 | 0.965(0.383-2.234)  | 0.862 | 1.091(0.526-2.263)  | 0.816 |
| T3 vs T1   | 1.156(0.518-2.579)  | 0.723 | 1.960(0.860-4.468)  | 0.109 | 1.757(0.856-3.577)  | 0.120 |
| N stage    |                     | 0.047 |                     | 0.059 |                     | 0.022 |
| N1 vs N0   | 0.796(0.050-12.743) | 0.872 | 2.336(0.243-22.482) | 0.463 | 1.651(0.302-9.025)  | 0.563 |
| N2-3 vs N0 | 5.403(0.737-39.585) | 0.097 | 6.231(0.855-45.416) | 0.071 | 4.495(1.094-18.465) | 0.037 |
| RT dose    | 0.778(0.238-2.551)  | 0.619 | 0.821(0.292-2.303)  | 0.707 | 1.062(0.482-2.343)  | 0.881 |
| IC         | 0.655(0.314-1.365)  | 0.258 | 1.035(0.551-1.943)  | 0.915 | 0.871(0.508-1.493)  | 0.614 |
| CC         | 0.738(0.330-1.647)  | 0.458 | 0.803(0.390-1.654)  | 0.551 | 0.863(0.474-1.568)  | 0.628 |
| AC         | 0.431(0.187-0.995)  | 0.049 | 0.613(0.306-1.225)  | 0.166 | 0.523(0.286-0.957)  | 0.036 |

Table S2 Results of multivariate analysis of DMFS, OS and DFS.

| Variables | HR    | 95%CI       | p     |
|-----------|-------|-------------|-------|
| DMFS      |       |             |       |
| N stage   | 3.297 | 1.191-9.130 | 0.022 |
| OS        |       |             |       |
| T stage   | 1.499 | 0.978-2.296 | 0.063 |
| N stage   | 2.521 | 1.163-5.464 | 0.019 |
| DFS       |       |             |       |
| N stage   | 2.316 | 1.253-4.277 | 0.007 |

Table S3 Patients' characteristics and treatment data between standard dose group and de-escalated dose group before and after match (1:3 match).

| Variables        |        | Before match      |               |       | After match   |       |
|------------------|--------|-------------------|---------------|-------|---------------|-------|
|                  |        | De-escalated dose | Standard dose | p     | Standard dose | p     |
| Age              | ≤50    | 18 (56%)          | 123(53%)      | 0.695 | 46(58%)       | 0.904 |
|                  | >50    | 14(44%)           | 111(47%)      |       | 34(43%)       |       |
| Gender           | Male   | 17(53%)           | 182(78%)      | 0.003 | 55(69%)       | 0.119 |
|                  | Female | 15(47%)           | 52(22%)       |       | 25(31%)       |       |
| T stage          | T1     | 10(32%)           | 51(22%)       | 0.467 | 26(33%)       | 0.992 |
|                  | T2     | 11(34%)           | 99(42%)       |       | 27(34%)       |       |
|                  | T3     | 11(34%)           | 84(36%)       |       | 27(34%)       |       |
| N stage          | N0     | 7(22%)            | 25(11%)       | 0.031 | 17(21%)       | 0.874 |
|                  | N1     | 1(3%)             | 39(17%)       |       | 5(6%)         |       |
|                  | N2-3   | 24(75%)           | 170(72%)      |       | 58(73%)       |       |
| chemothe<br>rapy | Yes    | 25(78%)           | 193(83%)      | 0.548 | 63(79%)       | 0.942 |
|                  | No     | 7(22%)            | 41(17%)       |       | 17(21%)       |       |
| IC               | Yes    | 20(63%)           | 143(61%)      | 0.880 | 53(66%)       | 0.707 |
|                  | No     | 12(37%)           | 91(39%)       |       | 27(34%)       |       |

Table S4 survival between standard dose group and de-escalated dose group before and after match (1:3 match).

| Survival | Before match      |               |       | After match   |       |
|----------|-------------------|---------------|-------|---------------|-------|
|          | De-escalated dose | Standard dose | p     | Standard dose | p     |
| LRFS     | 92.5%             | 93.7%         | 0.865 | 88.7%         | 0.564 |
| DMFS     | 89.5%             | 85.0%         | 0.678 | 82.5%         | 0.690 |
| OS       | 82.1%             | 81.7%         | 0.707 | 86.8%         | 0.809 |
| DFS      | 75.9%             | 78.1%         | 0.881 | 73.7%         | 0.931 |
